# Supplementary material for: The gut microbiome and degradation enzyme activity of wild freshwater fishes influenced by their trophic levels
Source: PubMed Central journal article supplement (PMC4829839; doi:10.1038/srep24340), 2016-04-13
Supplement: srep24340-s1.pdf [file srep24340-s1.pdf]

**The gut microbiome and degradation enzyme activity of wild freshwater fishes  
influenced by their trophic levels**

Han Liu<sup>1</sup>, Xianwu Guo<sup>3</sup>, Ravi Gooneratne<sup>4</sup>, Ruifang Lai<sup>1</sup>, Cong Zeng<sup>1</sup>, Fanbin Zhan<sup>1</sup>, Weimin

Wang<sup>1,2,\*</sup>

<sup>1</sup>College of Fisheries, Key Lab of Freshwater Animal Breeding, Ministry of Agriculture, Key Lab of Agricultural Animal Genetics, Breeding and Reproduction of Ministry of Education, Huazhong Agricultural University, Wuhan 430070, P. R. China

<sup>2</sup>Collaborative Innovation Center for Efficient and Health Production of Fisheries in Hunan Province, Changde 41500, China

<sup>3</sup>Laboratorio de Biotecnología Genómica, Centro de Biotecnología Genómica, Instituto Politécnico Nacional, Boulevard del Maestro esquina El ás Piña, Colonia Narciso Mendoza, Ciudad Reynosa, 88710, Tamaulipas, Mexico

<sup>4</sup>Faculty of Agriculture and Life Sciences, Lincoln University, Lincoln 7647, New Zealand

\*Correspondence and requests for materials should be addressed to W.M.W.

([wangwm@mail.hzau.edu.cn](mailto:wangwm@mail.hzau.edu.cn))

## Supplementary Information

Supplementary information contains two Figures and two Tables.

**Figure S1**

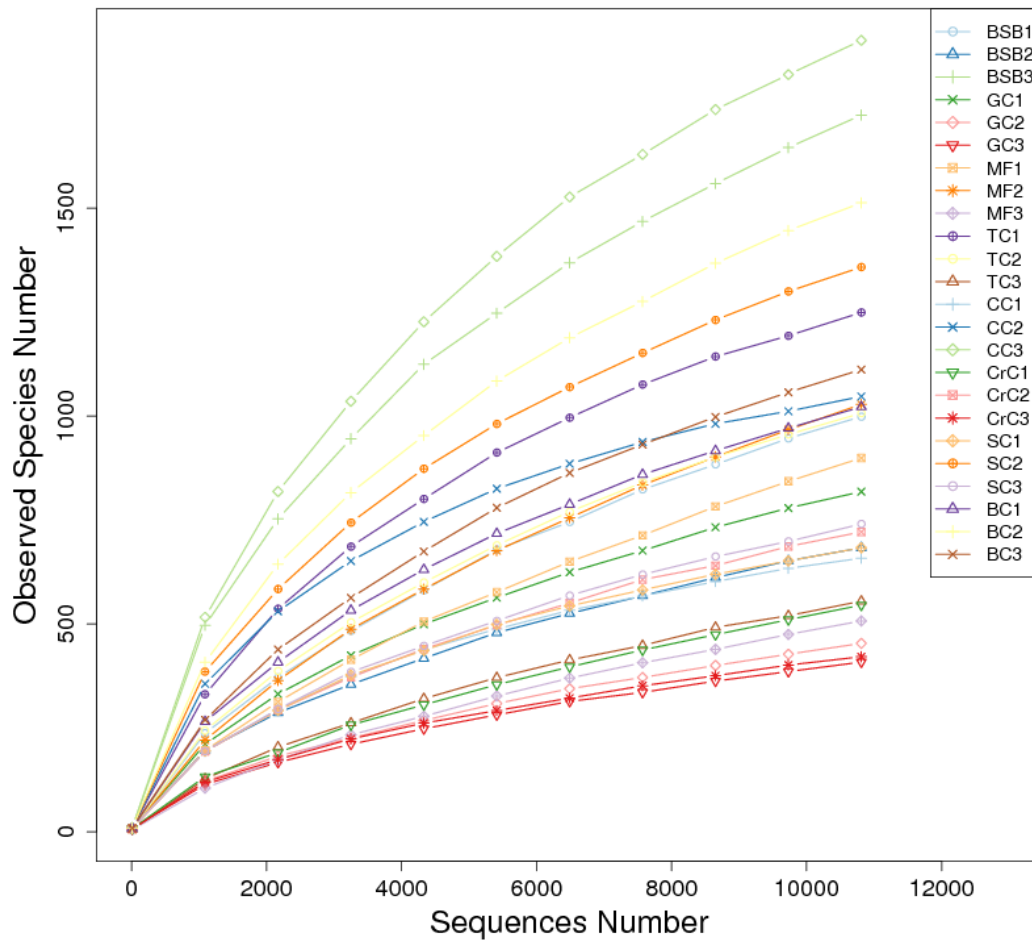

**Figure S1** Rarefaction analysis of different fish gut samples. Rarefaction curves analysis showing the number of detected OTUs per sample based on sequence number for 24 specimens. Sequences are clustered with similarity cut-off of 97%.

Figure S2:

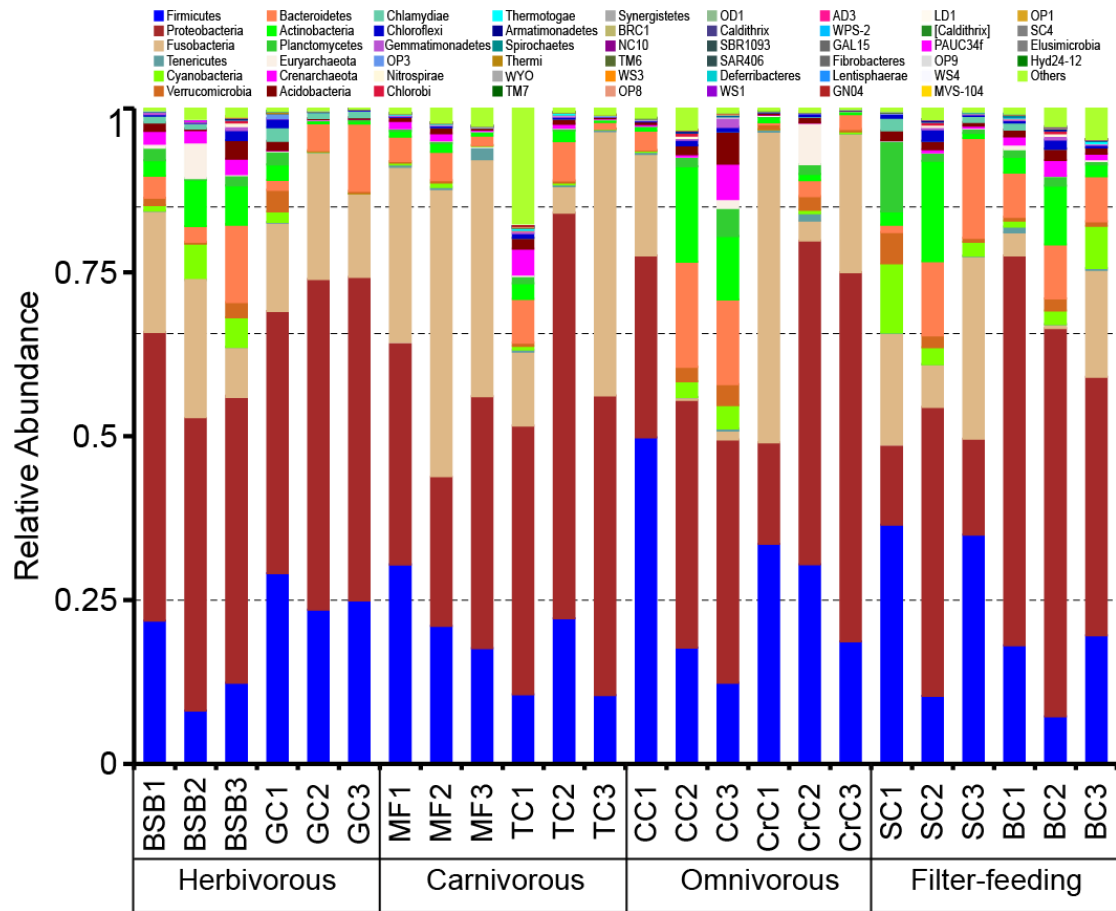

Figure S2 Individual relative abundance of OTUs for all taxa of gut microbiota in fishes with four trophic levels at phylum level.

**Table S1:**

Table S1 Sampling variables and statistics of sequenced raw data.

| <b>Library ID</b> | <b>Sample Name</b> | <b>Trophic levels</b> | <b>Rearing</b> | <b>Sampling Time</b> | <b>Temperature (°C)</b> | <b>Raw Data</b> | <b>Average Lenth (bp)</b> | <b>Q30</b> | <b>GC%</b> |
|-------------------|--------------------|-----------------------|----------------|----------------------|-------------------------|-----------------|---------------------------|------------|------------|
| 1                 | BSB1               | Herbivorous           | Wild           | 2013.11.6            | 16±0.8                  | 34,289          | 254                       | 94.56      | 53.21      |
| 2                 | BSB2               | Herbivorous           | Wild           | 2013.11.6            | 16±0.8                  | 90,299          | 256                       | 94.31      | 54.82      |
| 3                 | BSB3               | Herbivorous           | Wild           | 2013.11.6            | 16±0.8                  | 36,467          | 259                       | 94.86      | 54.74      |
| 4                 | GC1                | Herbivorous           | Wild           | 2013.11.6            | 16±0.8                  | 29,834          | 253                       | 94.39      | 53.07      |
| 5                 | GC2                | Herbivorous           | Wild           | 2013.11.6            | 16±0.8                  | 61,080          | 254                       | 94.59      | 52.48      |
| 6                 | GC3                | Herbivorous           | Wild           | 2013.11.6            | 16±0.8                  | 37,230          | 253                       | 94.5       | 51.57      |
| 7                 | MF1                | Carnivorous           | Wild           | 2013.11.6            | 16±0.8                  | 68,241          | 254                       | 94.74      | 53.13      |
| 8                 | MF2                | Carnivorous           | Wild           | 2013.11.6            | 16±0.8                  | 45,989          | 253                       | 94.6       | 50.92      |
| 9                 | MF3                | Carnivorous           | Wild           | 2013.11.6            | 16±0.8                  | 52,235          | 253                       | 94.72      | 49.32      |
| 10                | TC1                | Carnivorous           | Wild           | 2013.11.6            | 16±0.8                  | 19,060          | 253                       | 93.82      | 54.48      |
| 11                | TC2                | Carnivorous           | Wild           | 2013.11.6            | 16±0.8                  | 32,373          | 254                       | 94.53      | 54.27      |
| 12                | TC3                | Carnivorous           | Wild           | 2013.11.6            | 16±0.8                  | 47,665          | 254                       | 94.97      | 51.69      |
| 13                | CC1                | Omnivorus             | Wild           | 2013.11.6            | 16±0.8                  | 14,287          | 254                       | 94.79      | 52.12      |
| 14                | CC2                | Omnivorus             | Wild           | 2013.11.6            | 16±0.8                  | 18,958          | 260                       | 94.46      | 54.24      |
| 15                | CC3                | Omnivorus             | Wild           | 2013.11.6            | 16±0.8                  | 39,124          | 254                       | 94.46      | 54.85      |
| 16                | CrC1               | Omnivorus             | Wild           | 2013.11.6            | 16±0.8                  | 123,644         | 254                       | 94.6       | 50.7       |
| 17                | CrC2               | Omnivorus             | Wild           | 2013.11.6            | 16±0.8                  | 64,240          | 254                       | 95.55      | 52.67      |
| 18                | CrC3               | Omnivorus             | Wild           | 2013.11.6            | 16±0.8                  | 86,152          | 253                       | 94.72      | 52.47      |
| 19                | SC1                | Filter-feeding        | Wild           | 2013.11.6            | 16±0.8                  | 31,144          | 254                       | 93.9       | 53.27      |
| 20                | SC2                | Filter-feeding        | Wild           | 2013.11.6            | 16±0.8                  | 33,656          | 259                       | 94.85      | 54.14      |
| 21                | SC3                | Filter-feeding        | Wild           | 2013.11.6            | 16±0.8                  | 43,255          | 253                       | 94.66      | 51.62      |
| 22                | BC1                | Filter-feeding        | Wild           | 2013.11.6            | 16±0.8                  | 24,553          | 254                       | 94.15      | 53.92      |
| 23                | BC2                | Filter-feeding        | Wild           | 2013.11.6            | 16±0.8                  | 36,404          | 259                       | 95.13      | 54.61      |
| 24                | BC3                | Filter-feeding        | Wild           | 2013.11.6            | 16±0.8                  | 32,256          | 254                       | 94.64      | 53.08      |

**Table S2**

Table S2 Relative abundance (%) of potential cellulose-degrading bacteria in different trophic levels freshwater fish gut samples.

| <b>Bacteria</b>          | <b>Herbivorous</b> |             | <b>Carnivorous</b> |             | <b>Omnivorous</b> |             | <b>Filter-feeding</b> |             |
|--------------------------|--------------------|-------------|--------------------|-------------|-------------------|-------------|-----------------------|-------------|
|                          | <b>BSB</b>         | <b>GC</b>   | <b>MF</b>          | <b>TC</b>   | <b>CC</b>         | <b>CrC</b>  | <b>SC</b>             | <b>BC</b>   |
| <i>Vibrio</i>            | 0.04               | 0.04        | 0.03               | 0.06        | 0.13              | 0.02        | 0.04                  | 0.08        |
| <i>Bacillus</i>          | 0.04               | 0.02        | 0.03               | 0.03        | 0.07              | 0.02        | 0.03                  | 0.03        |
| <i>Actinomyces</i>       | 0.02               | 0.01        | 0.00               | 0.01        | 0.01              | 0.00        | 0.01                  | 0.02        |
| <i>Clostridium</i>       | 4.88               | 3.61        | 1.94               | 1.66        | 2.78              | 4.33        | 3.86                  | 2.68        |
| <i>Citrobacter</i>       | 1.42               | 1.05        | 0.03               | 0.07        | 0.31              | 0.09        | 0.52                  | 0.74        |
| <i>Erwinia</i>           | 0.08               | 0.05        | 0.05               | 0.15        | 0.13              | 0.16        | 0.06                  | 0.07        |
| <i>Pseudomonas</i>       | 0.17               | 0.02        | 0.05               | 0.07        | 0.14              | 0.05        | 0.08                  | 0.18        |
| <i>Brevundimonas</i>     | 0.01               | 0.00        | 0.01               | 0.01        | 0.01              | 0.00        | 0.01                  | 0.01        |
| <i>Paenibacillus</i>     | 0.05               | 0.00        | 0.00               | 0.00        | 0.00              | 0.00        | 0.00                  | 0.00        |
| <i>Pseudoxanthomonas</i> | 0.04               | 0.01        | 0.01               | 0.01        | 0.04              | 0.00        | 0.01                  | 0.01        |
| <i>Methylobacterium</i>  | 0.03               | 0.02        | 0.01               | 0.03        | 0.04              | 0.01        | 0.03                  | 0.06        |
| <i>Ruminococcus</i>      | 0.20               | 0.08        | 0.04               | 0.04        | 0.38              | 0.12        | 0.28                  | 0.23        |
| <i>Streptococcus</i>     | 0.49               | 2.72        | 0.00               | 0.01        | 0.15              | 0.01        | 0.34                  | 0.24        |
| <b>Total</b>             | <b>7.47</b>        | <b>7.63</b> | <b>2.20</b>        | <b>2.15</b> | <b>4.19</b>       | <b>4.81</b> | <b>5.27</b>           | <b>4.35</b> |
